# Supplementary material for: Ptxplatin: a multifunctional Pt(iv) antitumor prodrug
Source: Royal Society of Chemistry journal article supplement (doi:10.1039/d2qi01398c), 2022-01-01
Supplement: d2qi01398c1.pdf [file d2qi01398c1.pdf]

## Supplementary Information

### Ptxplatin: An multifunctional Pt(IV) antitumor prodrug

*Ran Zhang,<sup>a,b</sup> Yueyue Zhang,<sup>a</sup> Liumei Tang,<sup>a</sup> Yixing Xu,<sup>a</sup> Hao Li,<sup>a,b</sup> Xueping Jiang,<sup>a</sup>  
Xiangdong Xin<sup>a</sup>, and Zhongzheng Gui<sup>\*a,b</sup>*

<sup>a</sup> School of Biotechnology, Jiangsu University of Science and Technology, Zhenjiang,  
Jiangsu 212100, People's Republic of China

<sup>b</sup> Sericultural Research Institute, Chinese Academy of Agricultural Sciences,  
Zhenjiang, Jiangsu 212100, People's Republic of China

| <b>Table of Contents</b>                                                    | <b>Pages</b> |
|-----------------------------------------------------------------------------|--------------|
| <b>Fig. S1.</b> HR-MS spectrum of <b>1</b> .                                | S4           |
| <b>Fig. S2.</b> HR-MS spectrum of <b>2</b> .                                | S4           |
| <b>Fig. S3.</b> Structural characterization of PTX, <b>3</b> and <b>4</b> . | S5           |
| <b>Fig. S4.</b> <sup>13</sup> C-NMR spectrum of compound <b>3</b> .         | S5           |
| <b>Fig. S5.</b> HR-MS spectrum of compound <b>3</b> .                       | S6           |
| <b>Fig. S6.</b> HPLC characterization of compound <b>3</b> .                | S6           |
| <b>Fig. S7.</b> <sup>13</sup> C-NMR spectrum of compound <b>4</b> .         | S7           |
| <b>Fig. S8.</b> HR-MS spectrum of compound <b>4</b> .                       | S7           |
| <b>Fig. S9.</b> HPLC characterization of compound <b>4</b> .                | S8           |
| <b>Fig. S10.</b> <sup>1</sup> H-NMR spectrum of compound <b>5</b> .         | S8           |
| <b>Fig. S11.</b> <sup>13</sup> C-NMR spectrum of compound <b>5</b> .        | S9           |
| <b>Fig. S12.</b> HR-MS spectrum of compound <b>5</b> .                      | S9           |
| <b>Fig. S13.</b> HPLC characterization of compound <b>5</b> .               | S10          |
| <b>Fig. S14.</b> <sup>1</sup> H-NMR spectrum of compound <b>6</b> .         | S10          |
| <b>Fig. S15.</b> <sup>13</sup> C-NMR spectrum of compound <b>6</b> .        | S11          |
| <b>Fig. S16.</b> HR-MS spectrum of compound <b>6</b> .                      | S11          |
| <b>Fig. S17.</b> HPLC characterization of compound <b>6</b> .               | S12          |
| <b>Fig. S18.</b> <sup>1</sup> H-NMR spectrum of compound <b>7</b> .         | S12          |
| <b>Fig. S19.</b> <sup>13</sup> C-NMR spectrum of compound <b>7</b> .        | S13          |
| <b>Fig. S20.</b> HR-MS spectrum of compound <b>7</b> .                      | S13          |
| <b>Fig. S21.</b> HPLC characterization of compound <b>7</b> .               | S14          |
| <b>Fig. S22.</b> <sup>1</sup> H-NMR spectrum of compound <b>8</b> .         | S14          |
| <b>Fig. S23.</b> <sup>13</sup> C-NMR spectrum of compound <b>8</b> .        | S15          |
| <b>Fig. S24.</b> HR-MS spectrum of compound <b>8</b> .                      | S15          |
| <b>Fig. S25.</b> HPLC characterization of compound <b>8</b> .               | S16          |

|                                                                                      |     |
|--------------------------------------------------------------------------------------|-----|
| <b>Fig. S26.</b> <sup>1</sup> H-NMR spectrum of compound <b>9</b> .                  | S16 |
| <b>Fig. S27.</b> <sup>13</sup> C-NMR spectrum of compound <b>9</b> .                 | S17 |
| <b>Fig. S28.</b> HR-MS spectrum of compound <b>9</b> .                               | S17 |
| <b>Fig. S29.</b> HPLC characterization of compound <b>9</b> .                        | S18 |
| <b>Fig. S30.</b> <sup>1</sup> H-NMR spectrum of compound <b>10</b> .                 | S18 |
| <b>Fig. S31.</b> <sup>13</sup> C-NMR spectrum of compound <b>10</b> .                | S19 |
| <b>Fig. S32.</b> HR-MS spectrum of compound <b>10</b> .                              | S19 |
| <b>Fig. S33.</b> HPLC characterization of compound <b>10</b> .                       | S20 |
| <b>Fig. S34.</b> <sup>1</sup> H-NMR spectrum of compound <b>11</b> .                 | S20 |
| <b>Fig. S35.</b> <sup>13</sup> C-NMR spectrum of compound <b>11</b> .                | S21 |
| <b>Fig. S36.</b> HR-MS spectrum of compound <b>11</b> .                              | S21 |
| <b>Fig. S37.</b> HPLC characterization of compound <b>11</b> .                       | S22 |
| <b>Fig. S38.</b> <sup>1</sup> H-NMR spectrum of compound <b>12</b> .                 | S22 |
| <b>Fig. S39.</b> <sup>13</sup> C-NMR spectrum of compound <b>12</b> .                | S23 |
| <b>Fig. S40.</b> HR-MS spectrum of compound <b>12</b> .                              | S23 |
| <b>Fig. S41.</b> HPLC characterization of compound <b>12</b> .                       | S24 |
| <b>Fig. S42.</b> The expressions of MMP-2 in MCF-7 cells.                            | S24 |
| <b>Fig. S43.</b> Cellular accumulation of Pt compounds in MCF-7 cells.               | S25 |
| <b>Fig. S44.</b> The results of HR-MS for cell extract after treated with <b>5</b> . | S25 |

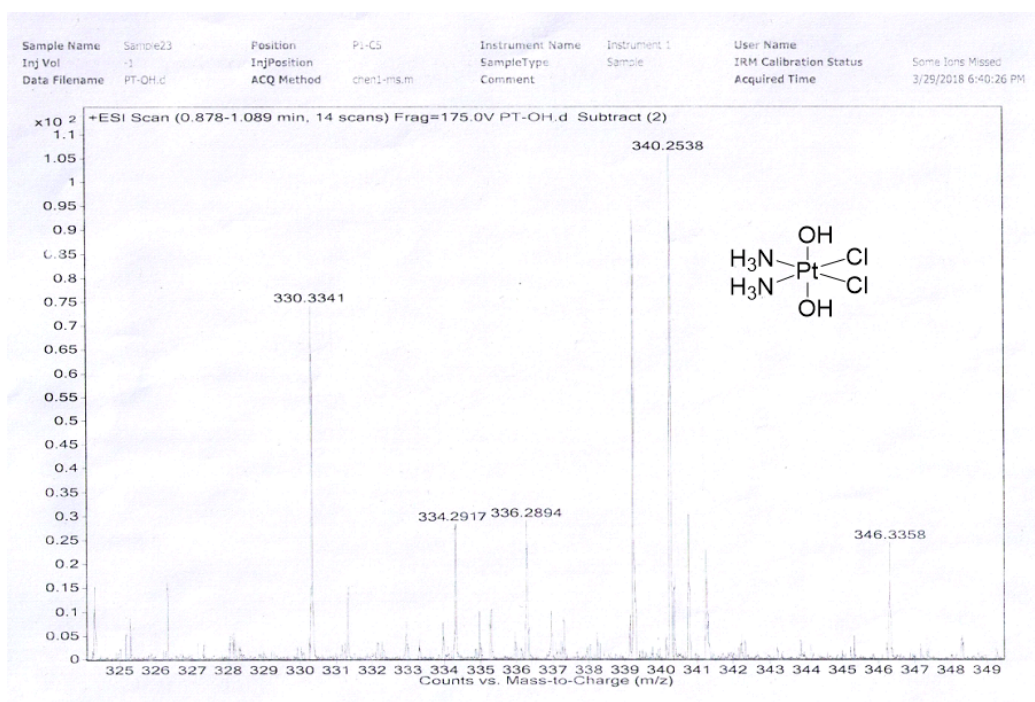

**Fig. S1.** HR-MS spectrum of compound 1.

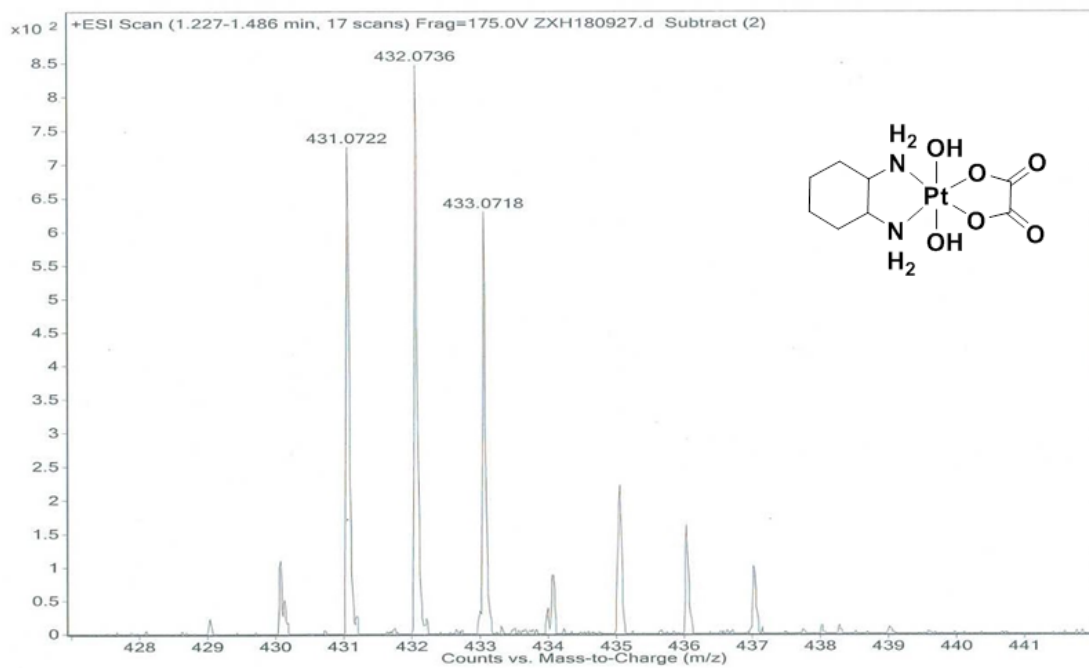

**Fig. S2.** HR-MS spectrum of compound 2.

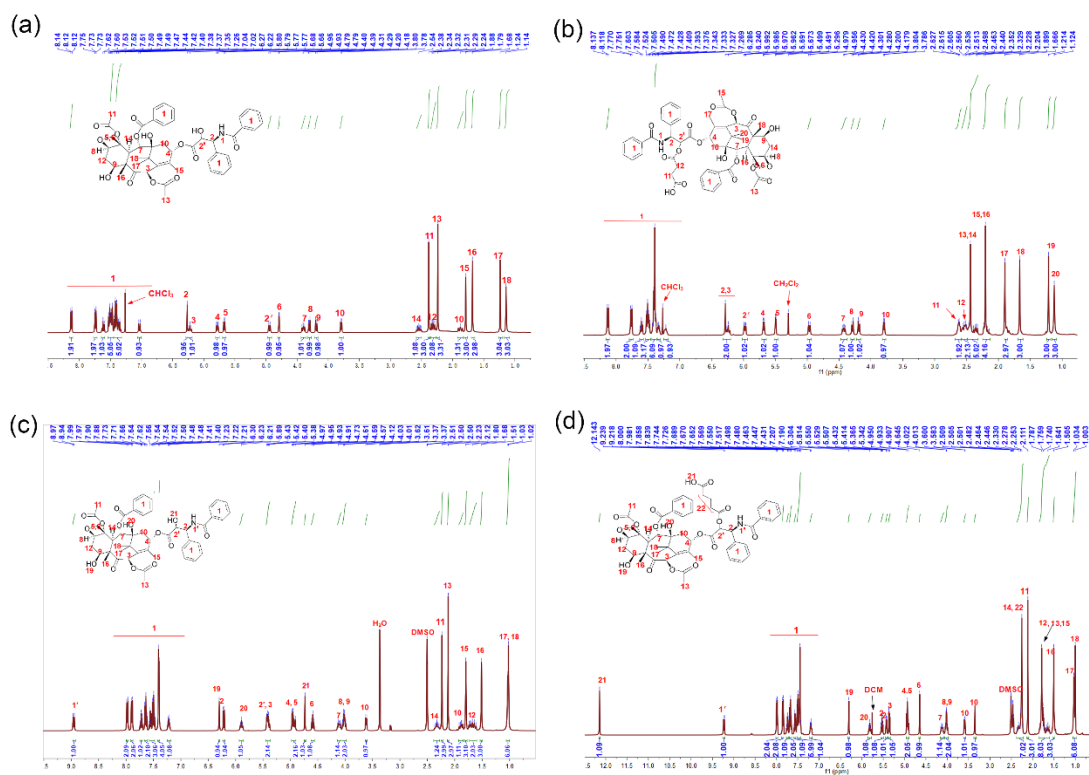

**Fig. S3.** Structural characterization of PTX, **3** and **4**.  $^1\text{H}$  NMR spectra of (a) PTX in  $\text{CDCl}_3$ , (b) compound **3** in  $\text{CDCl}_3$ , (c) PTX in  $\text{DMSO-}d_6$ , (d) compound **4** in  $\text{DMSO-}d_6$ .

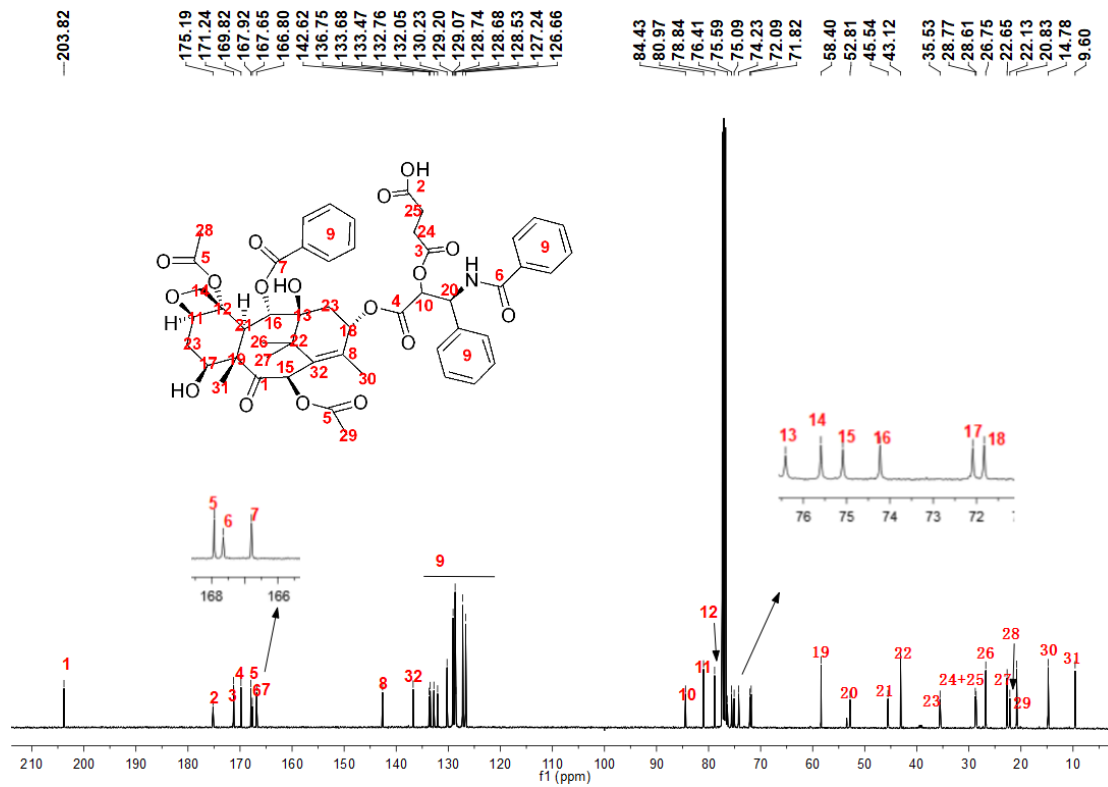

**Fig. S4.**  $^{13}\text{C}$  NMR spectrum of compound **3** in  $\text{CDCl}_3$

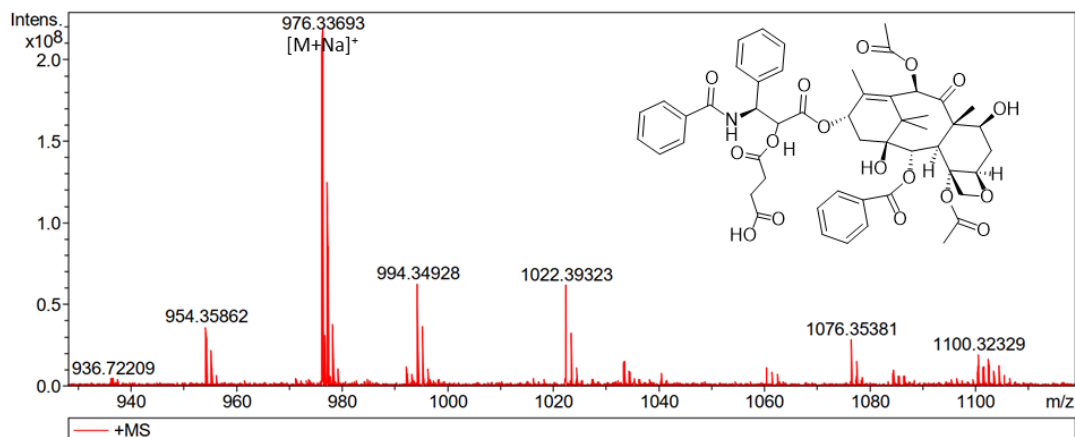

**Fig. S5.** HR-MS spectrum of compound 3.

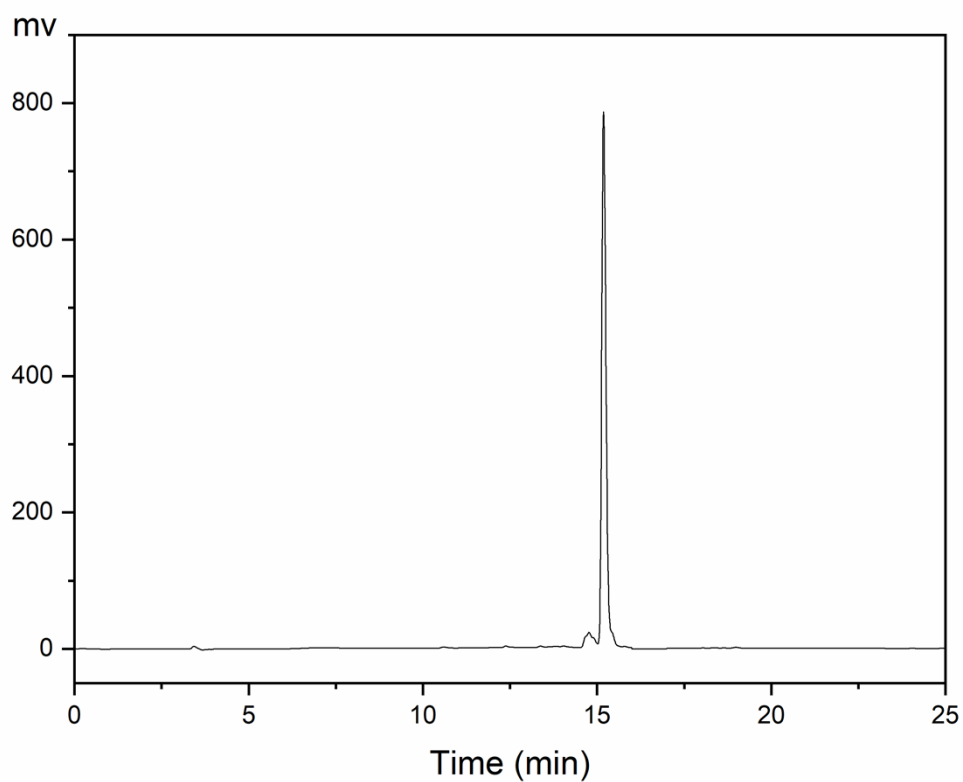

**Fig. S6.** HPLC characterization of compound 3.

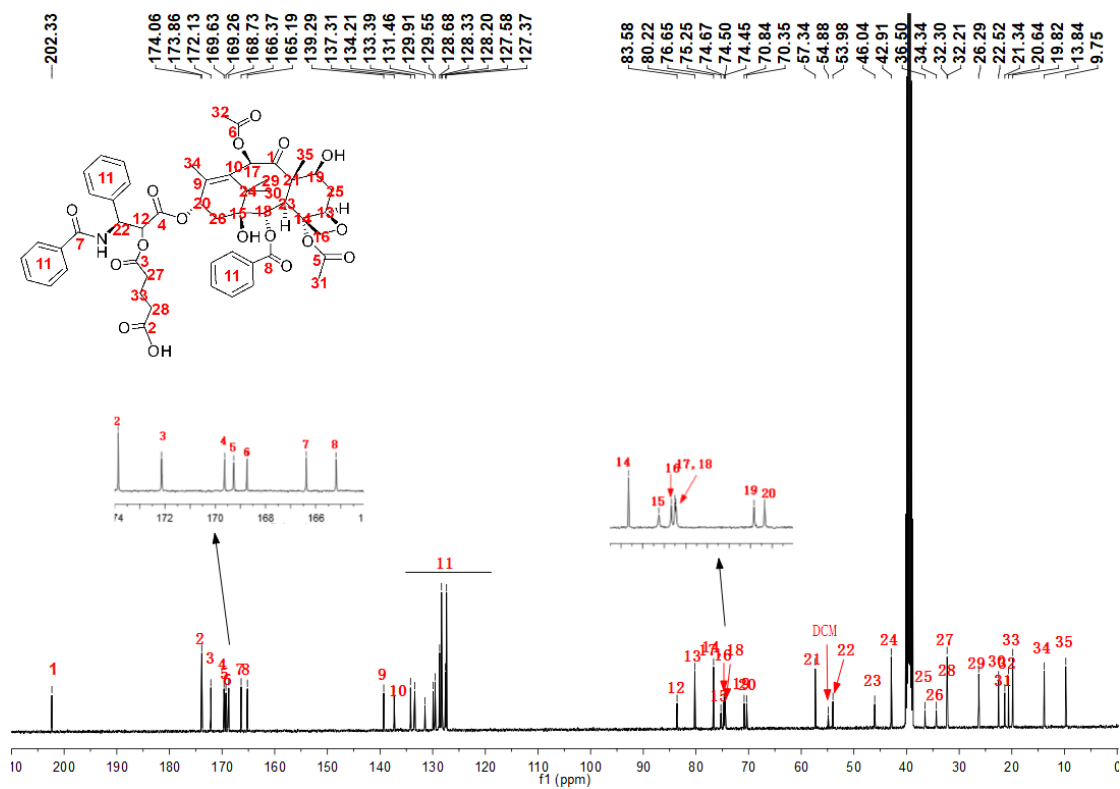

**Fig. S7.**  $^{13}\text{C}$  NMR spectrum of compound **4** in  $\text{DMSO-}d_6$ .

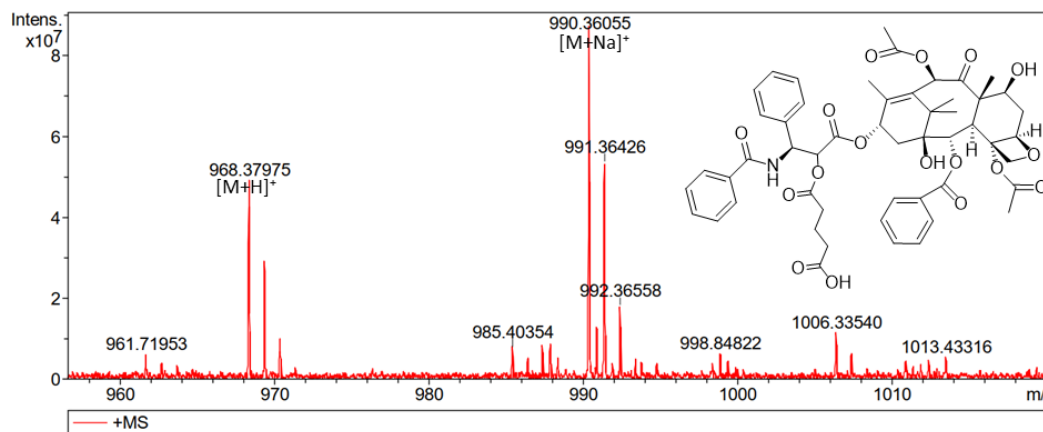

**Fig. S8.** HR-MS spectrum of compound **4**.

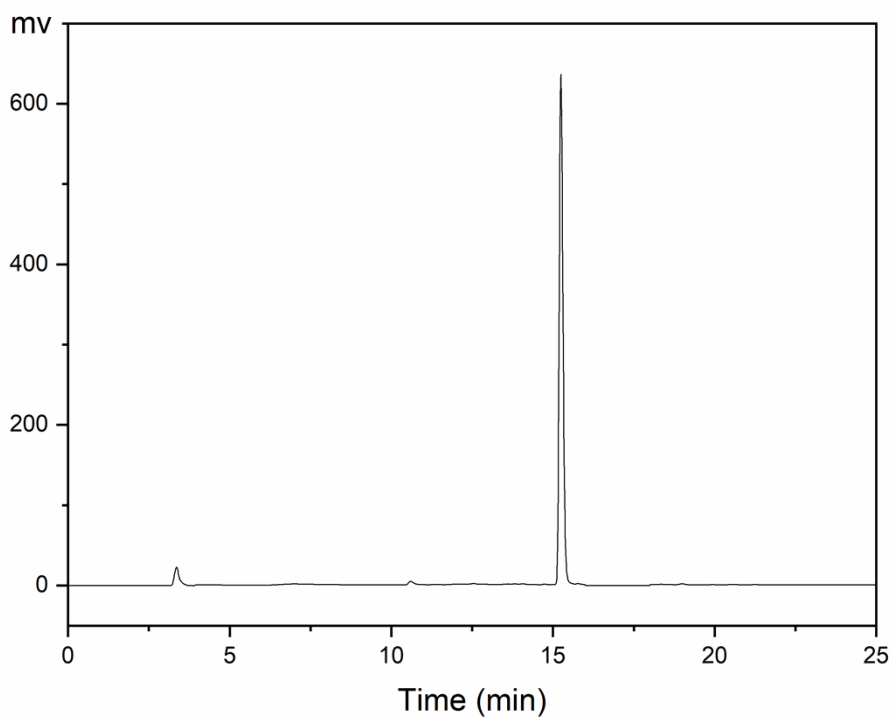

**Fig. S9.** HPLC characterization of compound 4.

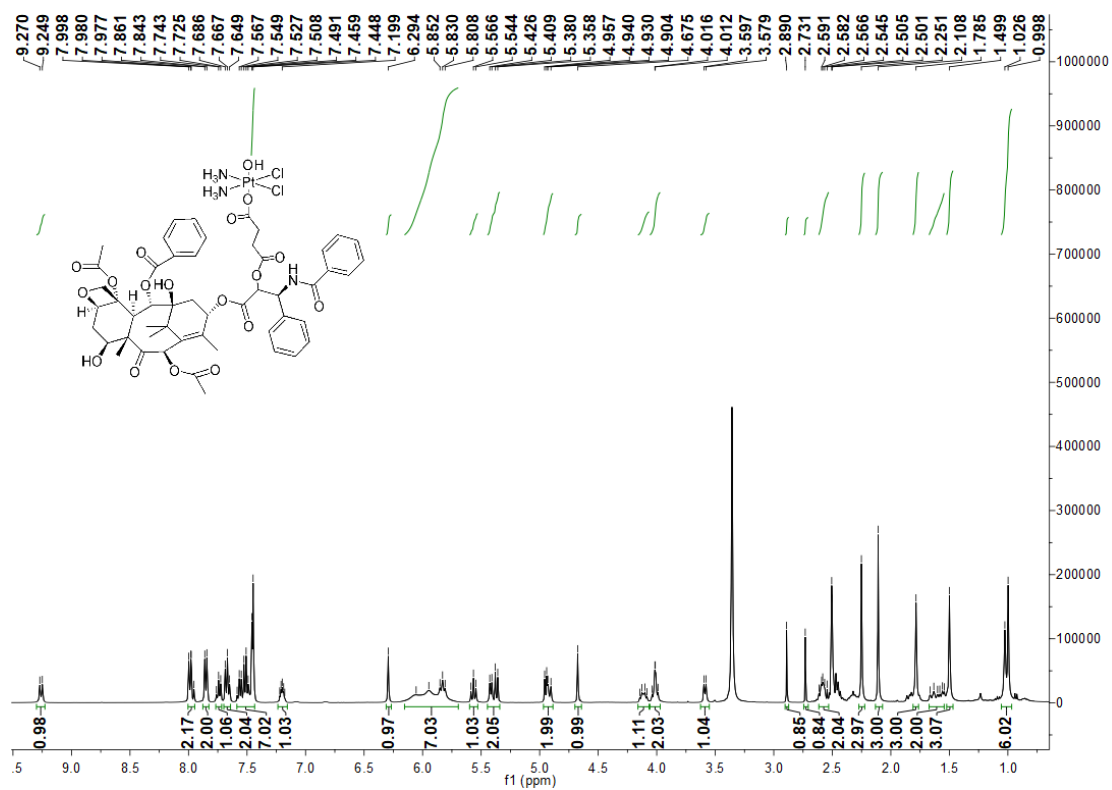

**Fig. S10.** <sup>1</sup>H-NMR spectrum of compound 5 in DMSO-*d*<sub>6</sub>.



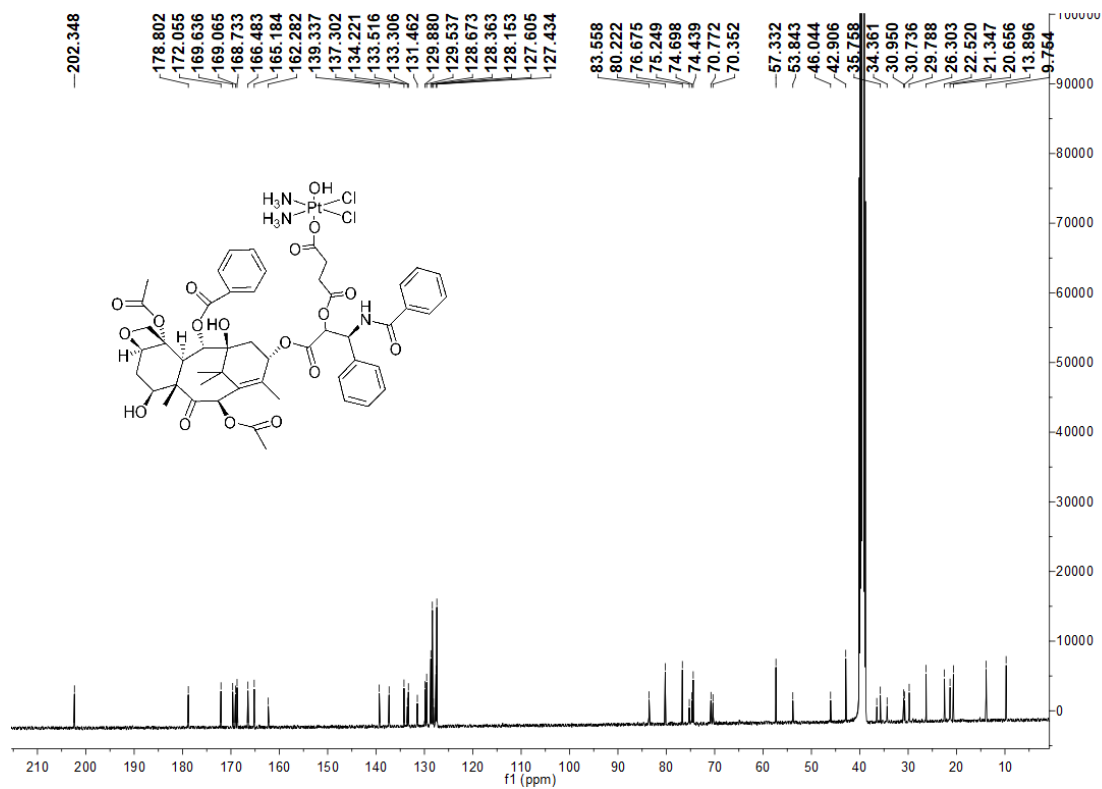

**Fig. S11.**  $^{13}\text{C}$ -NMR spectrum of compound **5** in  $\text{DMSO-}d_6$ .

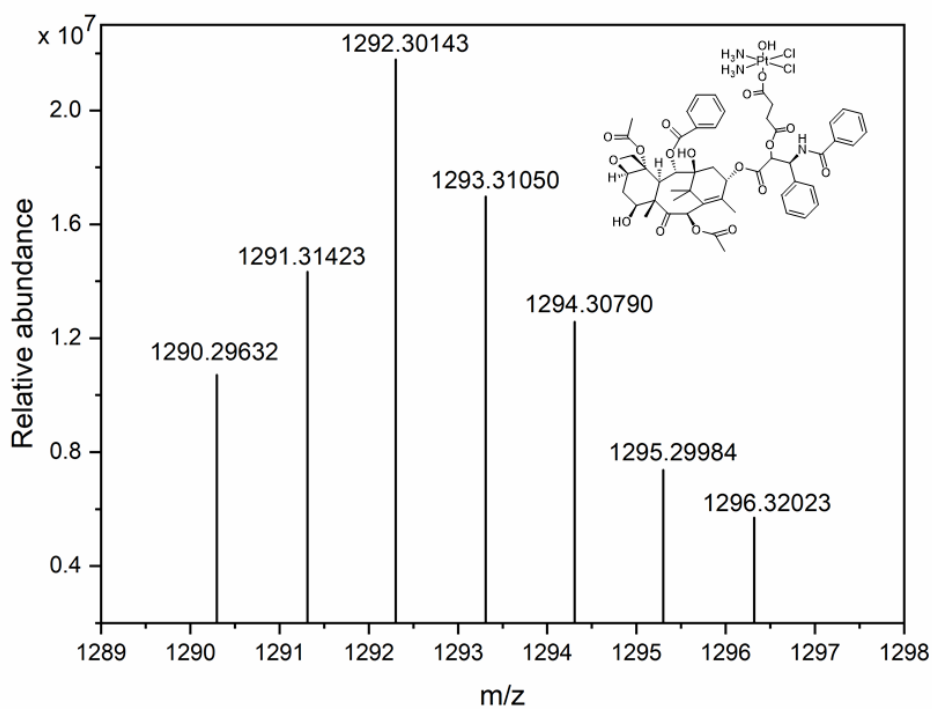

**Fig. S12.** HR-MS spectrum (positive mode) of compound **5**.

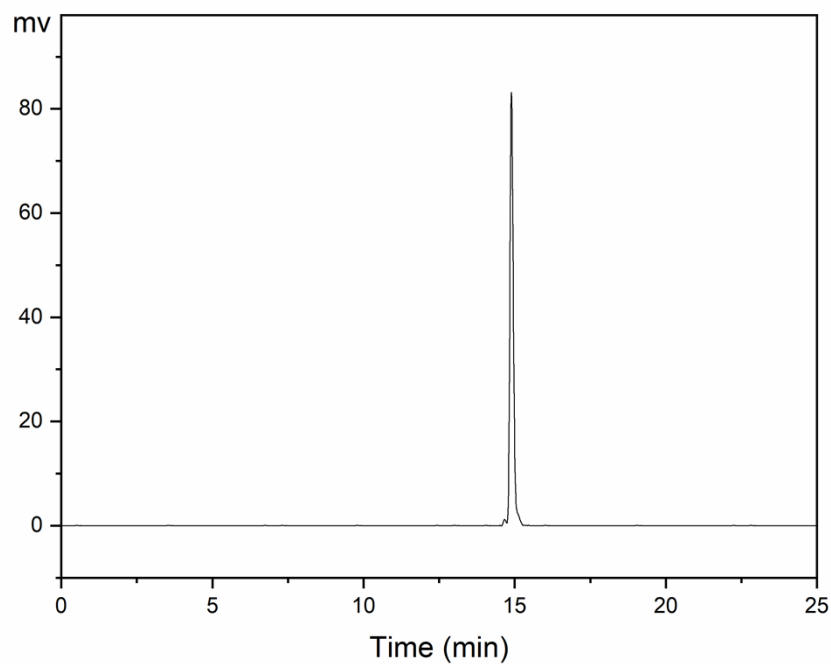

**Fig. S13.** HPLC characterization of compound **5**.

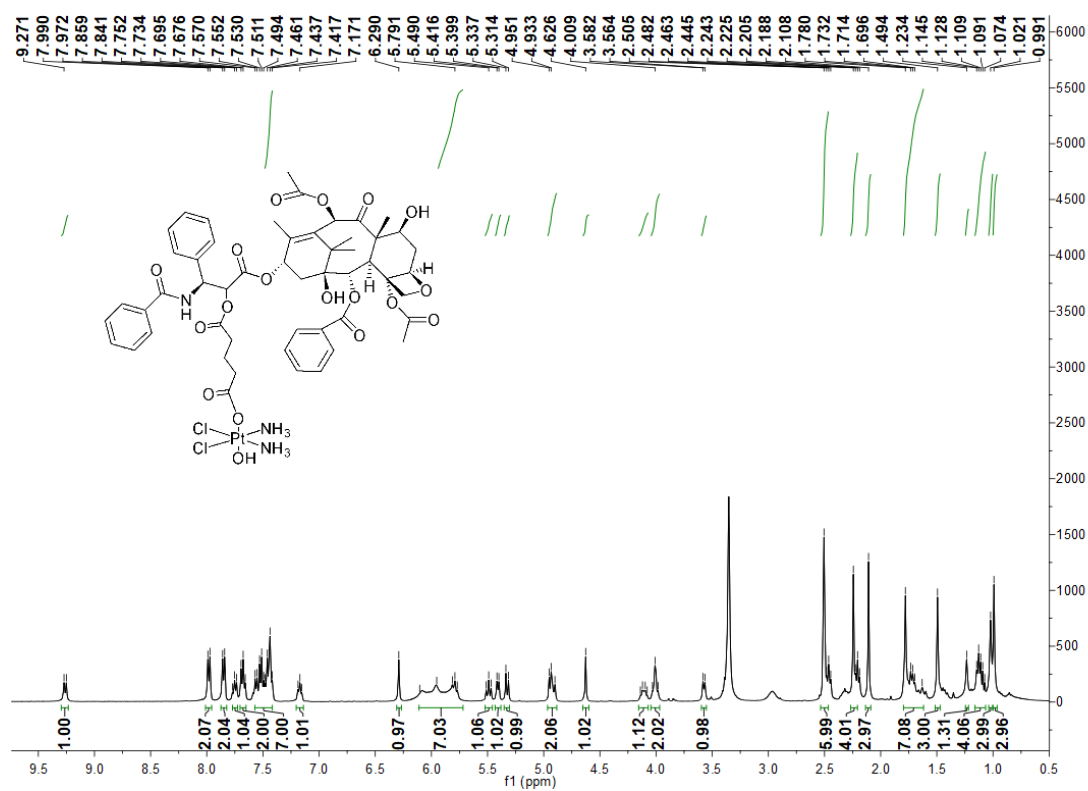

**Fig. S14.** <sup>1</sup>H-NMR spectrum of compound **6** in DMSO-*d*<sub>6</sub>.

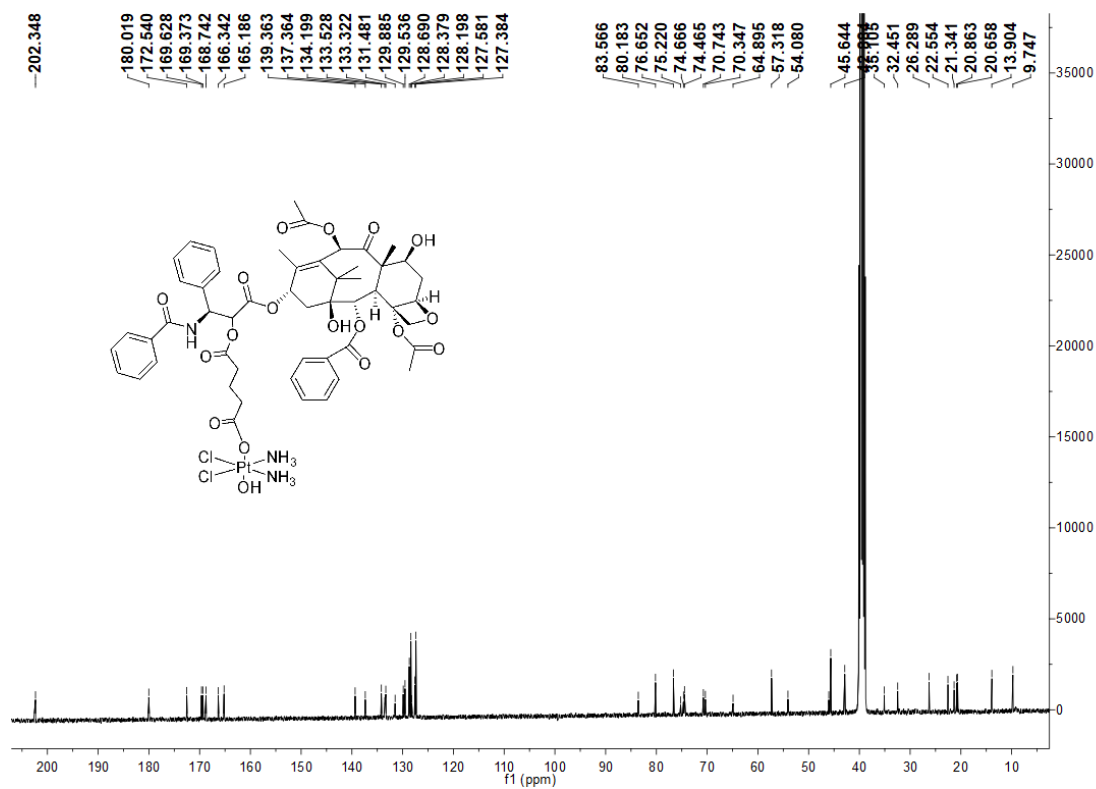

**Fig. S15.**  $^{13}\text{C}$ -NMR spectrum of compound **6** in DMSO- $d_6$ .

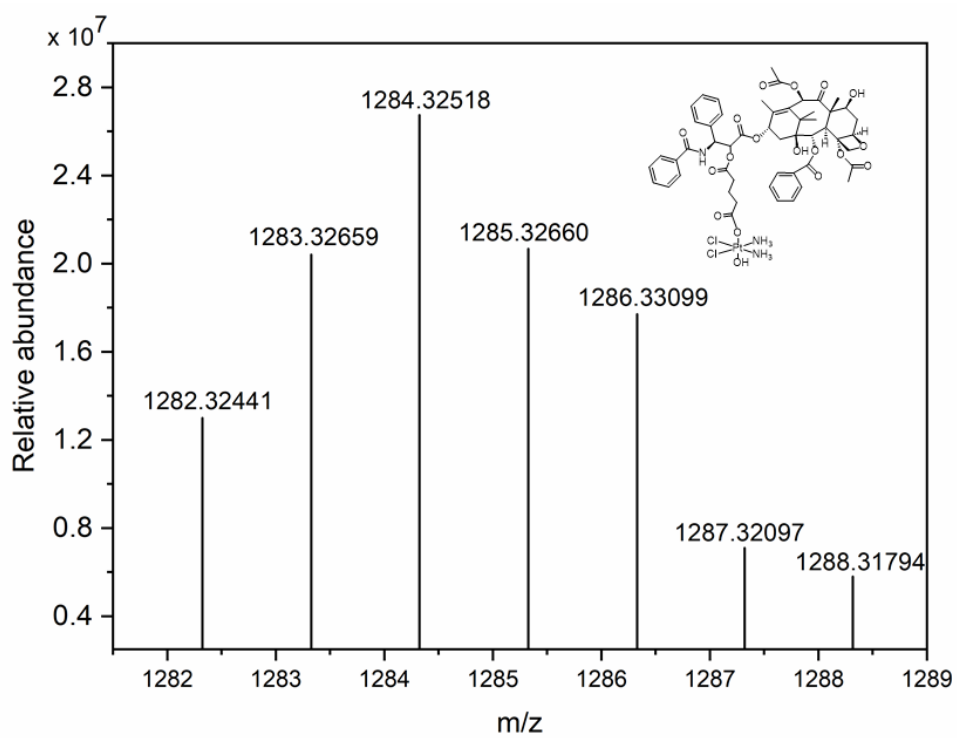

**Fig. S16.** HR-MS spectrum (positive mode) of compound **6**.

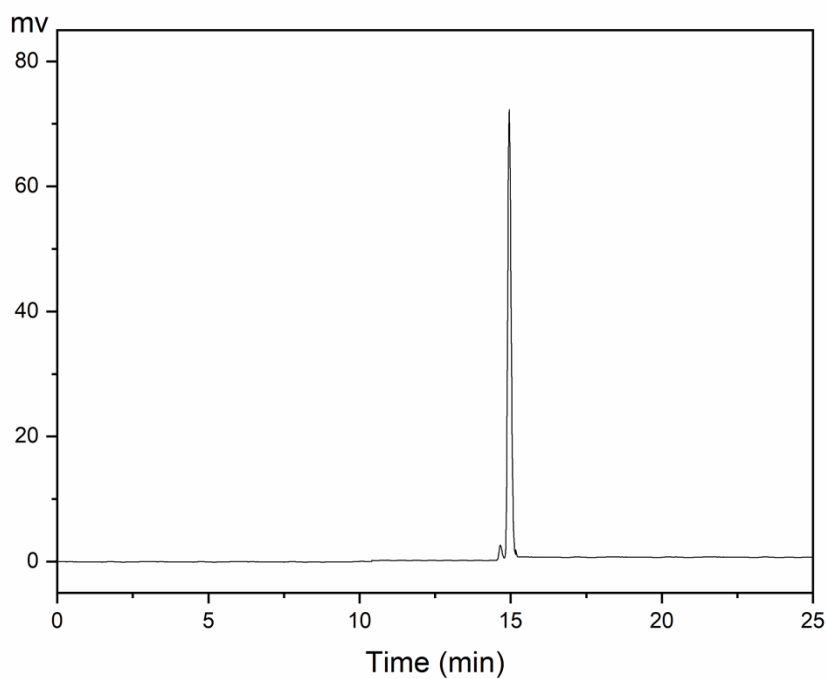

**Fig. S17.** HPLC characterization of compound **6**.

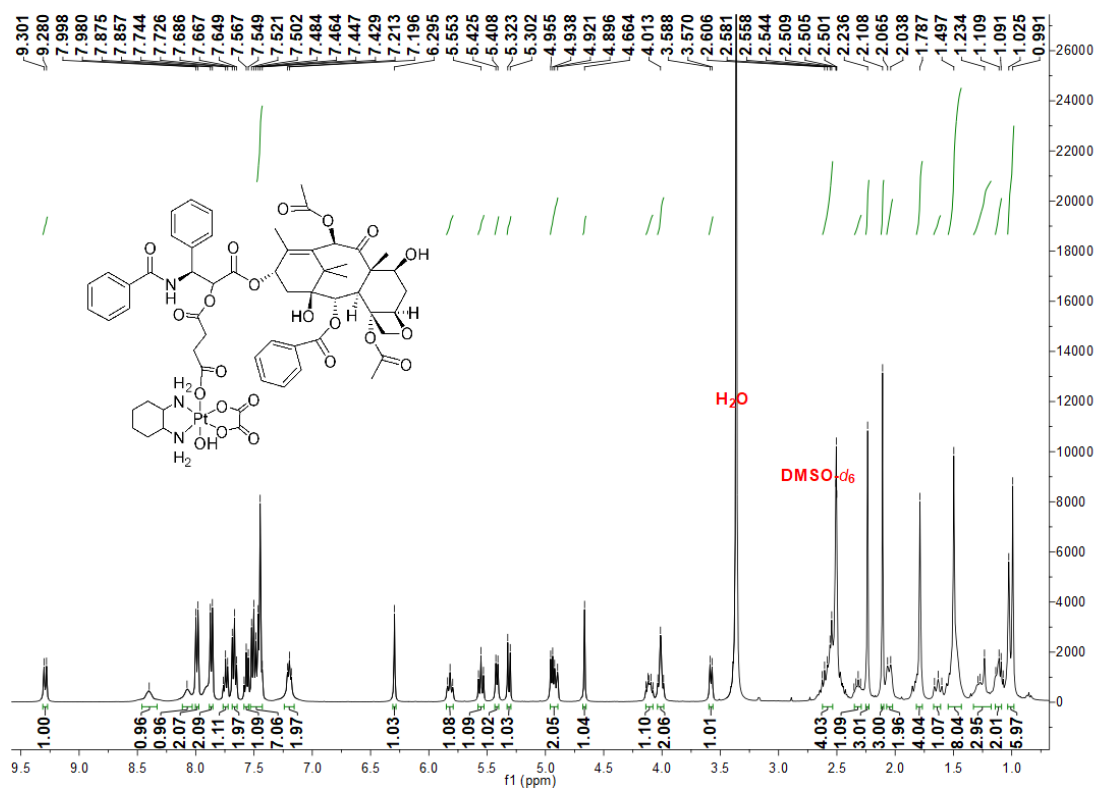

**Fig. S18.** <sup>1</sup>H-NMR spectrum of compound **7** in DMSO-*d*<sub>6</sub>.

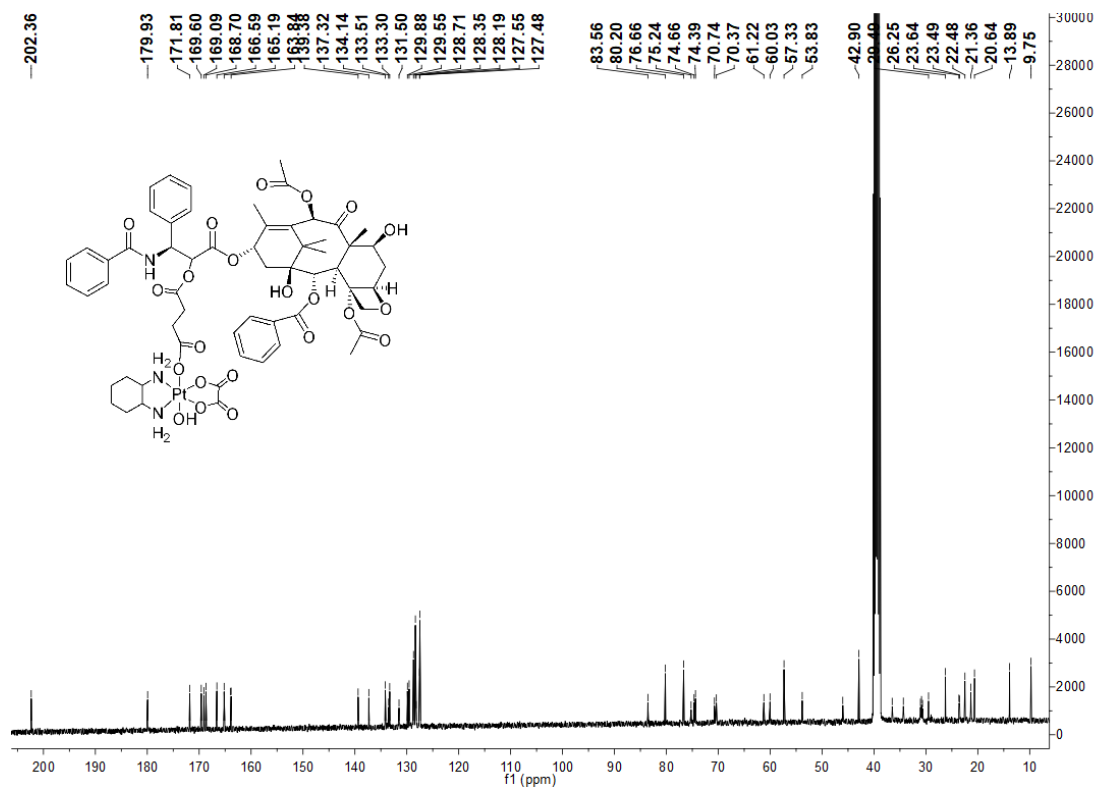

Fig. S19.  $^{13}\text{C}$ -NMR spectrum of compound 7 in DMSO- $d_6$ .

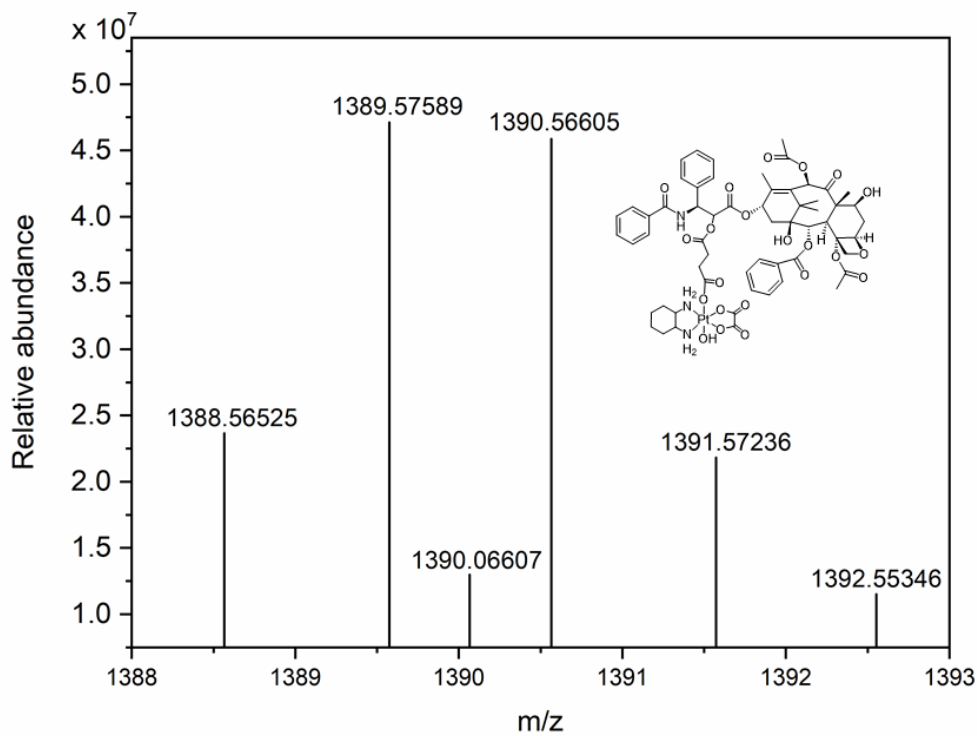

Fig. S20. HR-MS spectrum (positive mode) of compound 7.

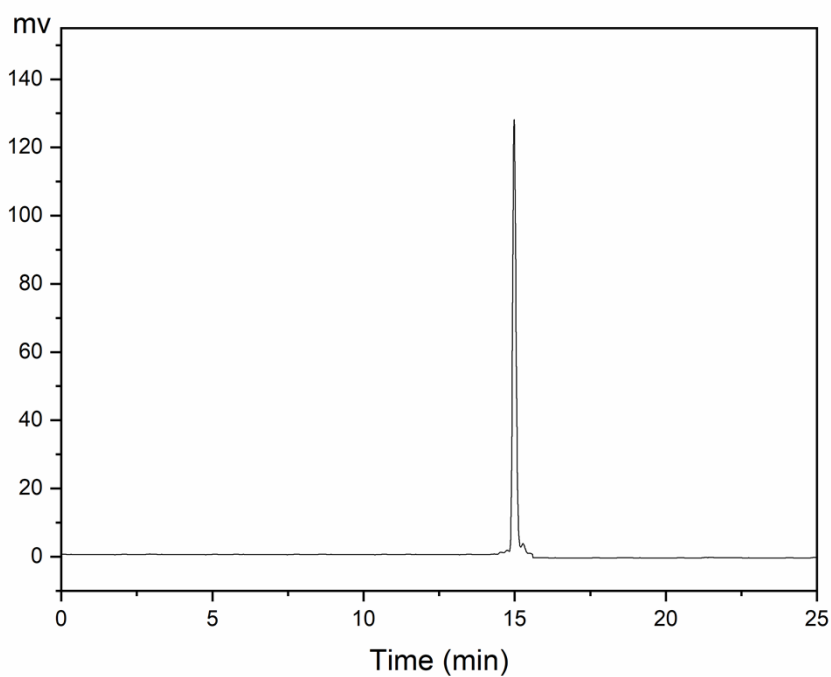

**Fig. S21.** HPLC characterization of compound 7.

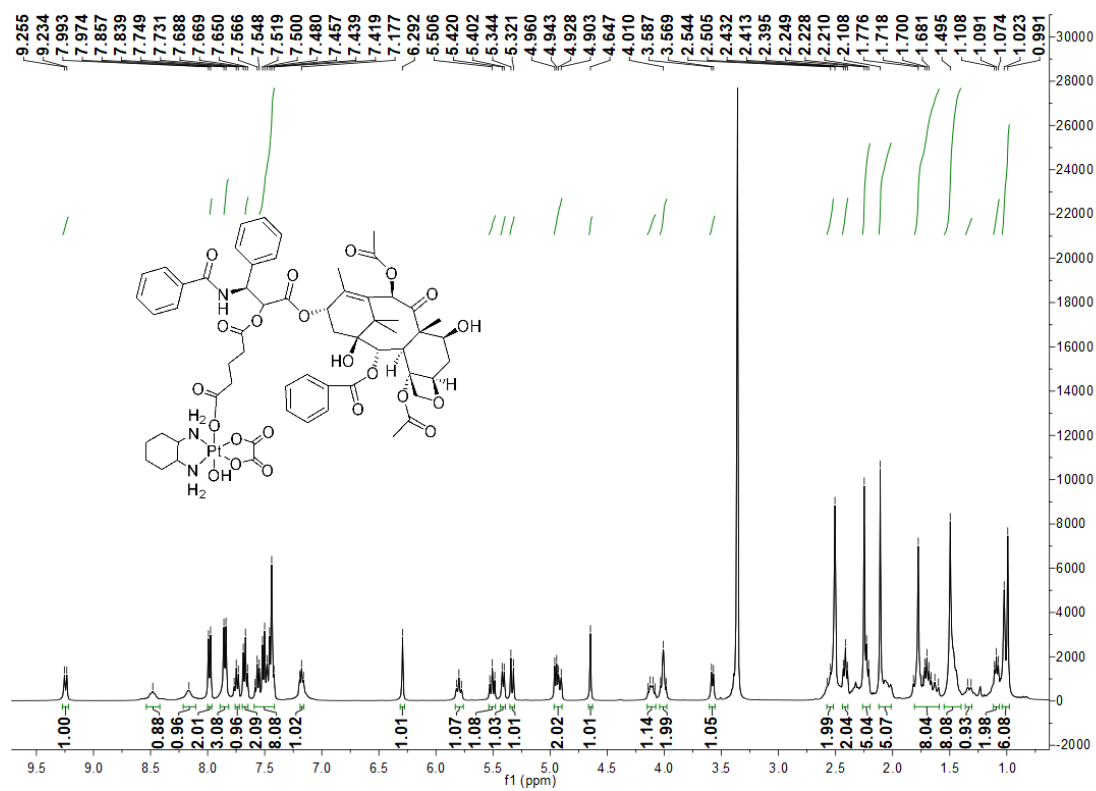

**Fig. S22.** <sup>1</sup>H-NMR spectrum of compound 8 in DMSO-*d*<sub>6</sub>.

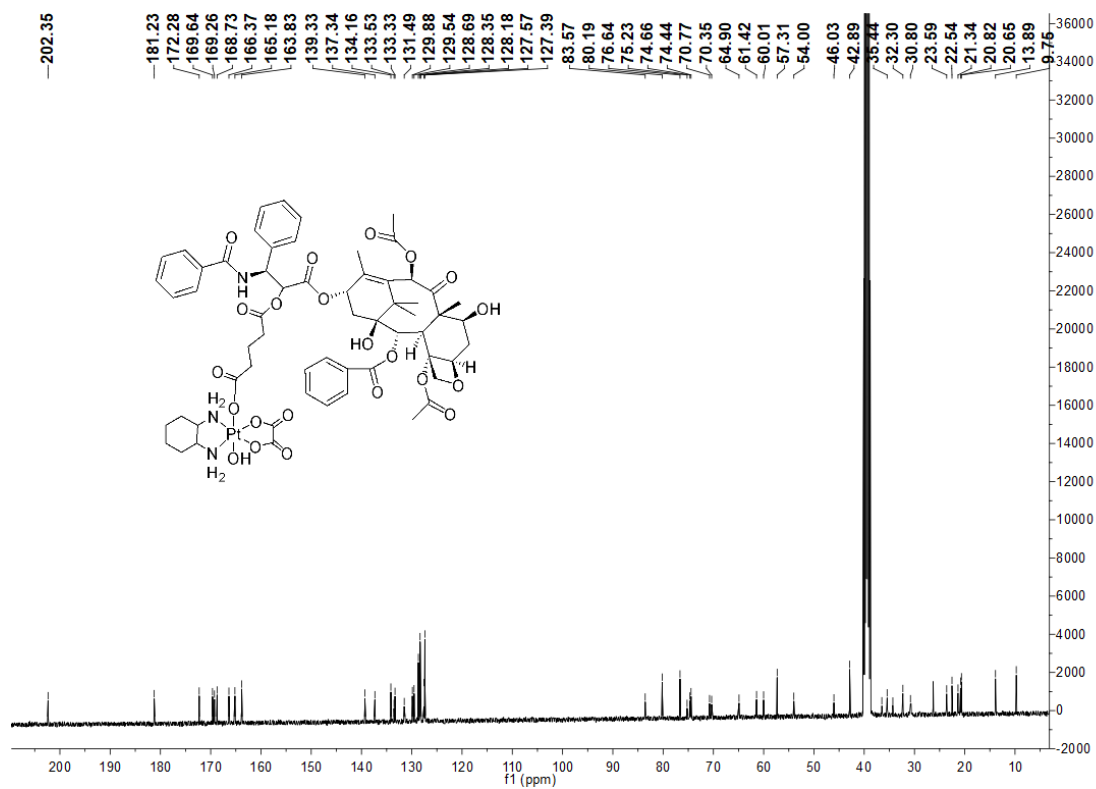

**Fig. S23.**  $^{13}\text{C}$ -NMR spectrum of compound **8** in  $\text{DMSO-}d_6$ .

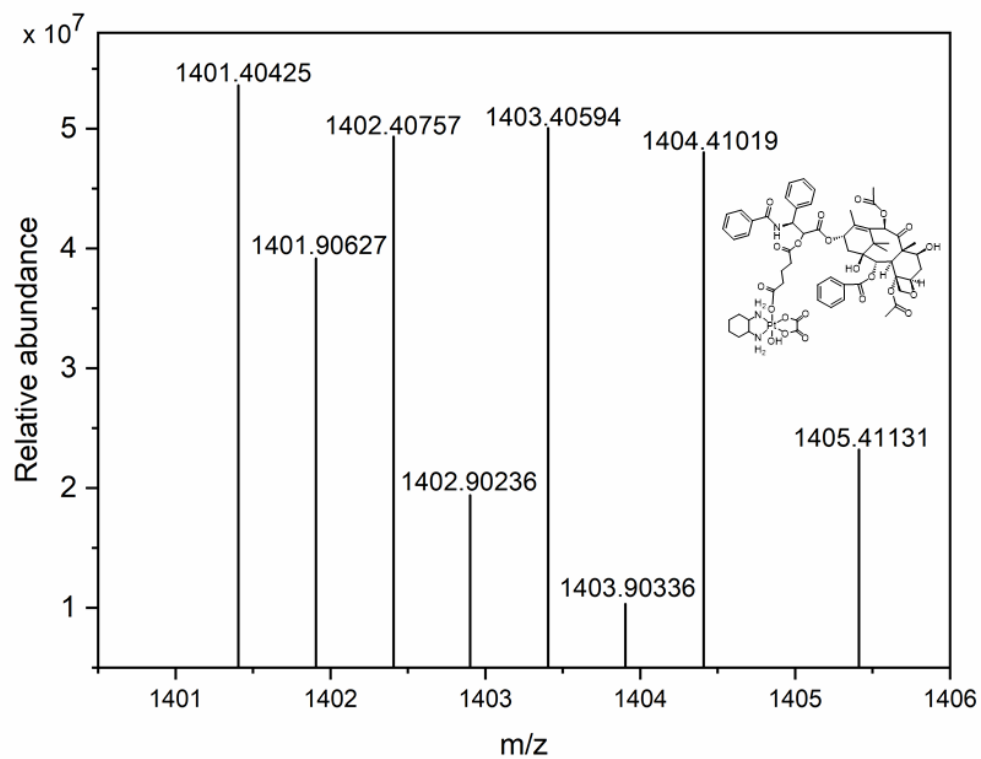

**Fig. S24.** HR-MS spectrum (positive mode) of compound **8**.

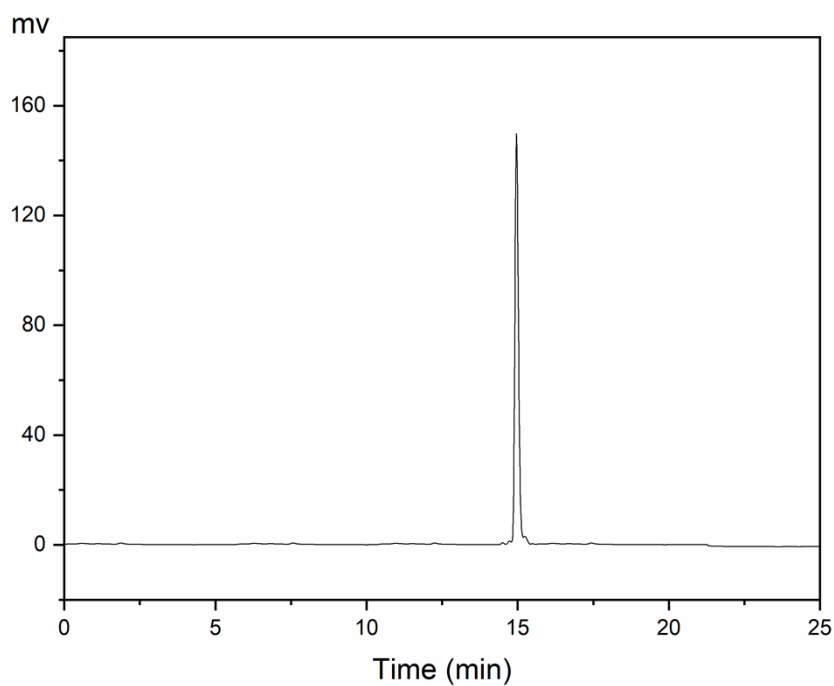

**Fig. S25.** HPLC characterization of compound **8**.

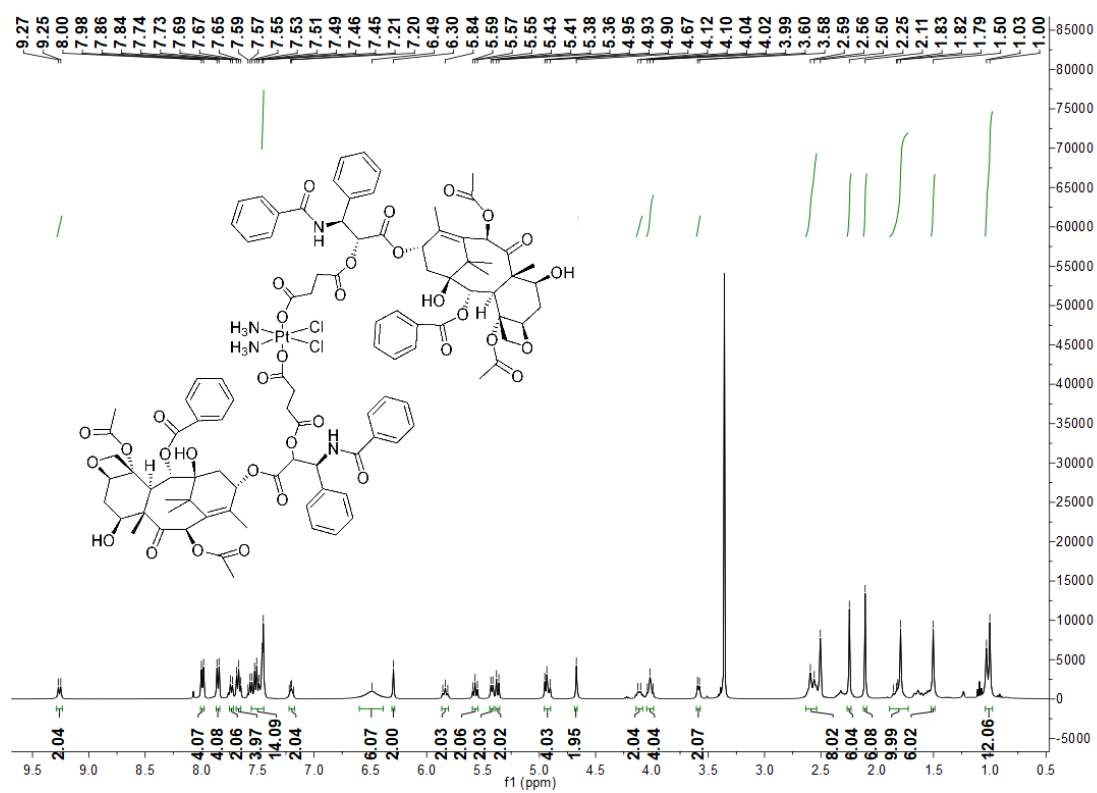

**Fig. S26.** <sup>1</sup>H-NMR spectrum of compound **9** in DMSO-*d*<sub>6</sub>.



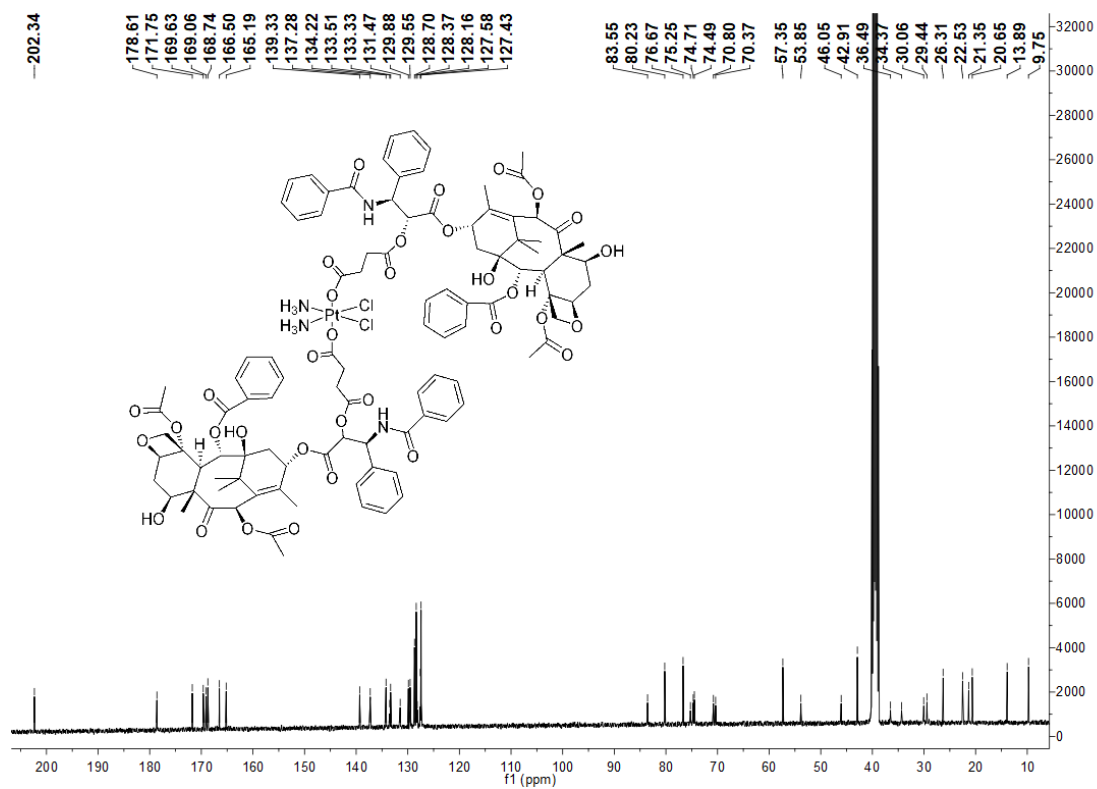

**Fig. S27.**  $^{13}\text{C}$ -NMR spectrum of compound **9** in  $\text{DMSO-}d_6$ .

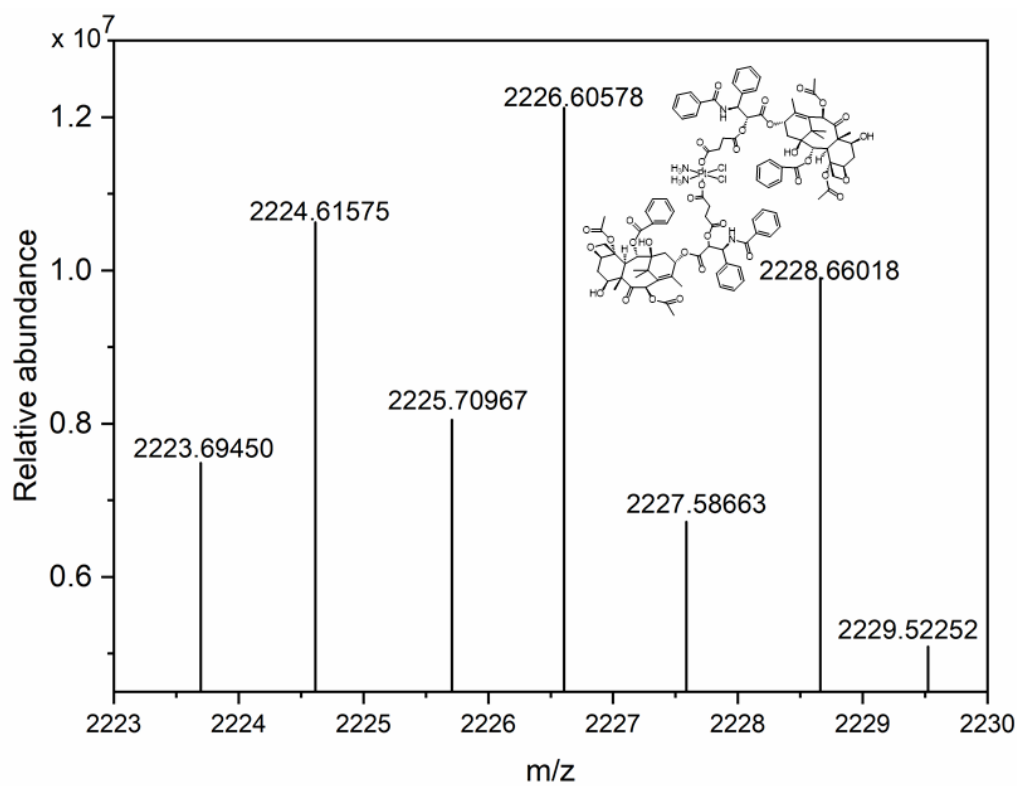

**S28.** HR-MS spectrum (positive mode) of compound **9**.



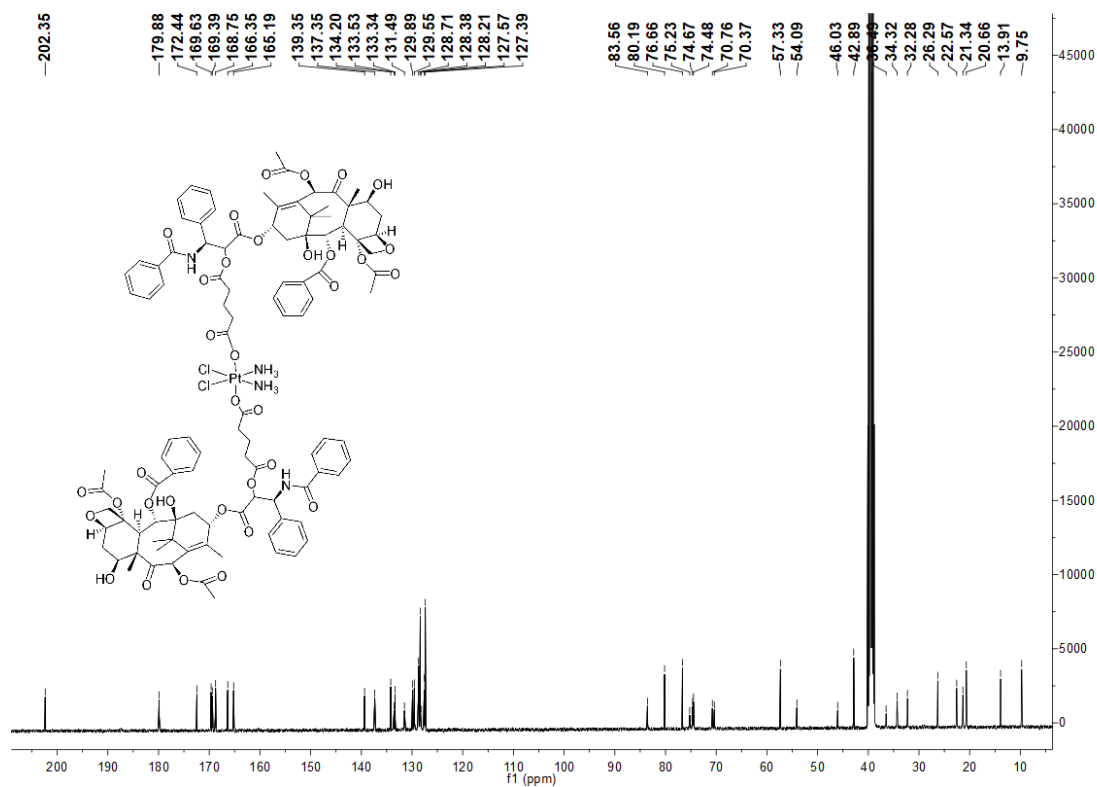

**Fig. S31.**  $^{13}\text{C}$ -NMR spectrum of compound **10** in DMSO- $d_6$ .

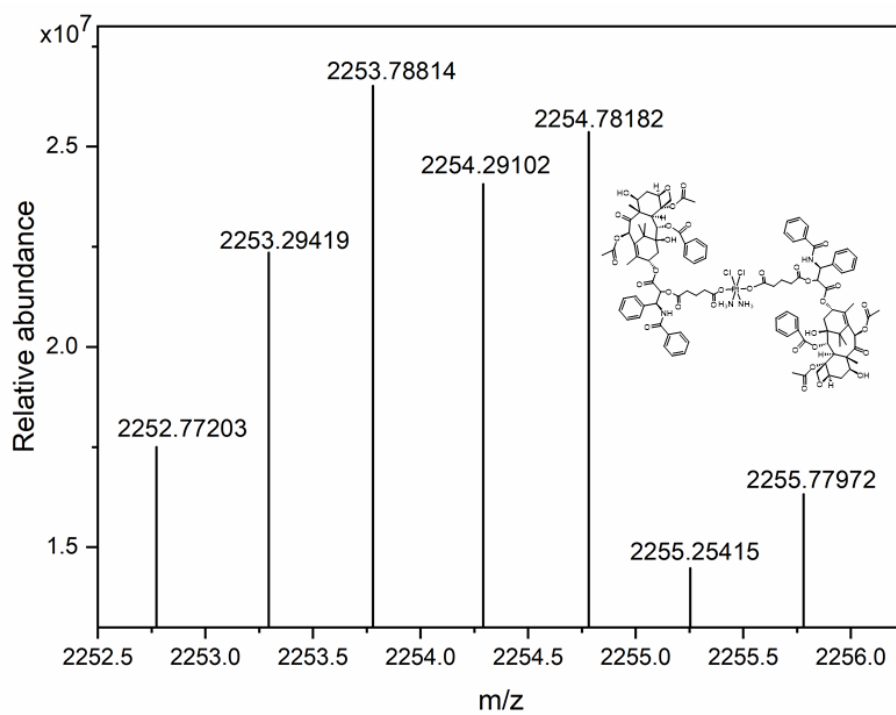

**Fig. S32.** HR-MS spectrum (positive mode) of compound **10**.

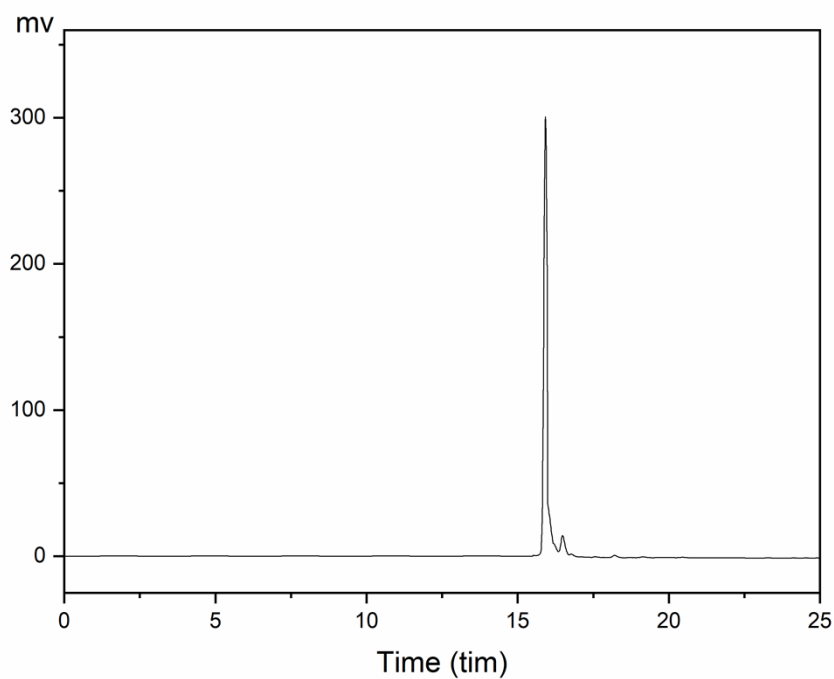

Fig. S33. HPLC characterization of compound 10.

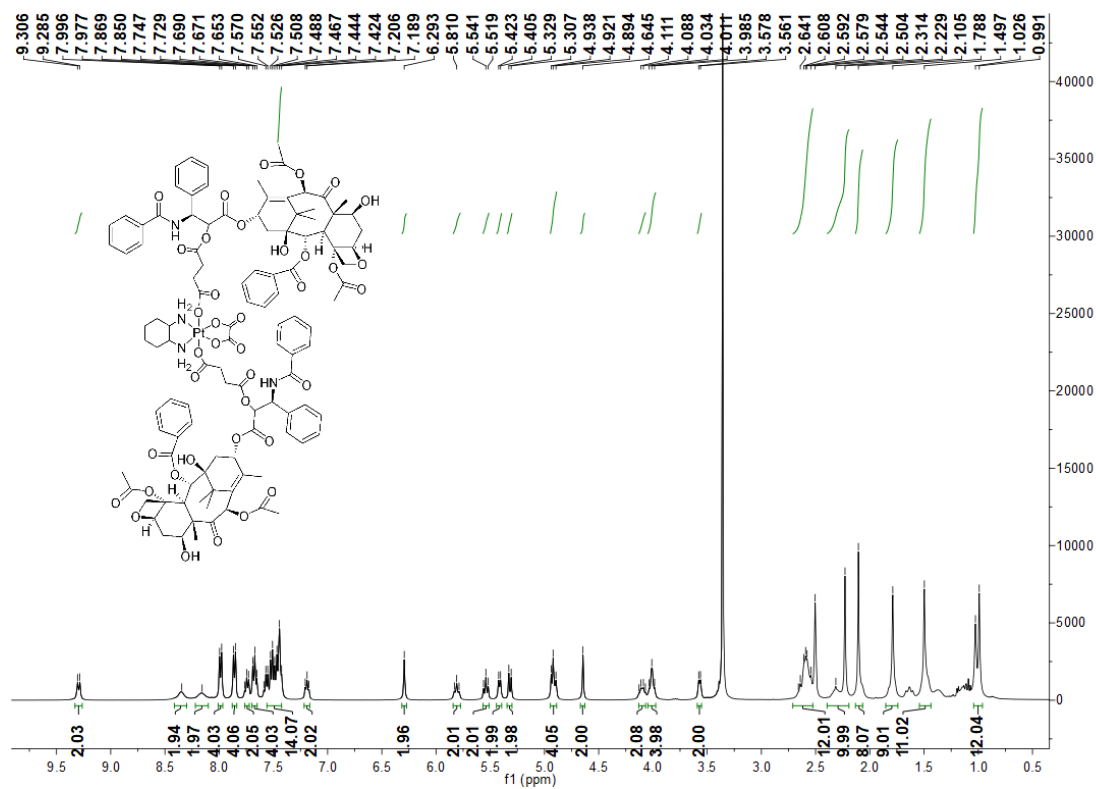

Fig. S34. <sup>1</sup>H-NMR spectrum of compound 11 in DMSO-*d*<sub>6</sub>.

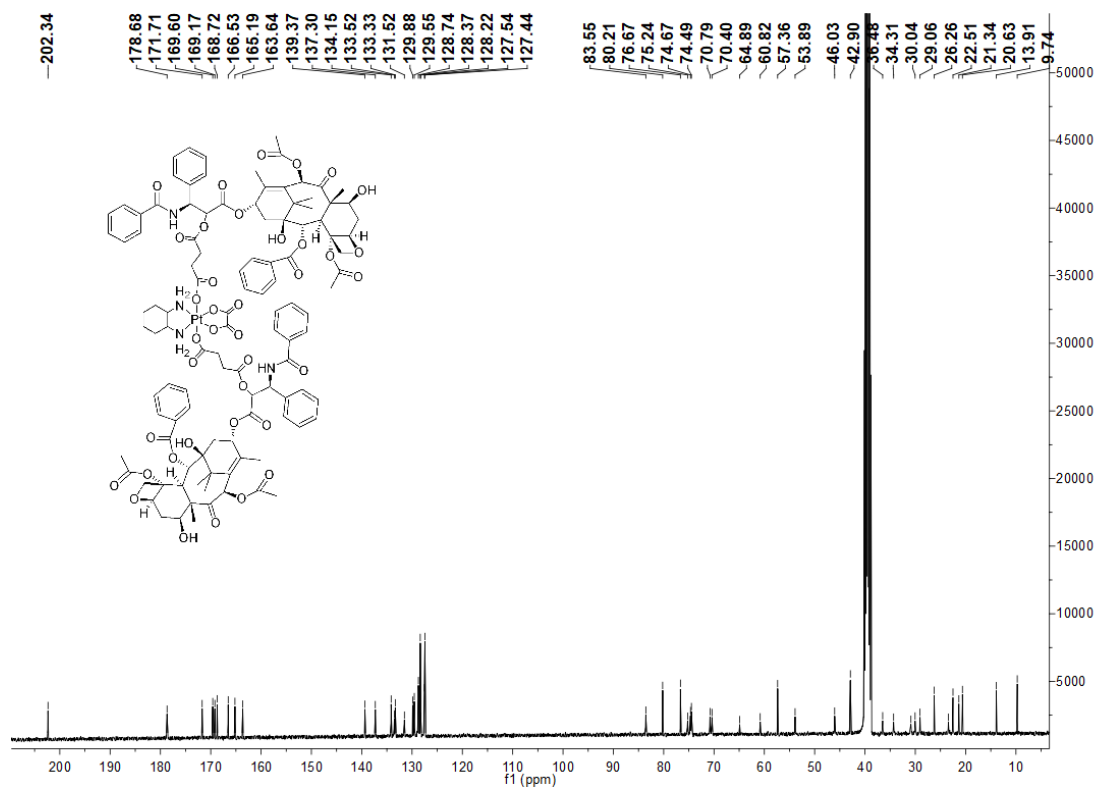

Fig. S35.  $^{13}\text{C}$ -NMR spectrum of compound **11** in  $\text{DMSO-}d_6$ .

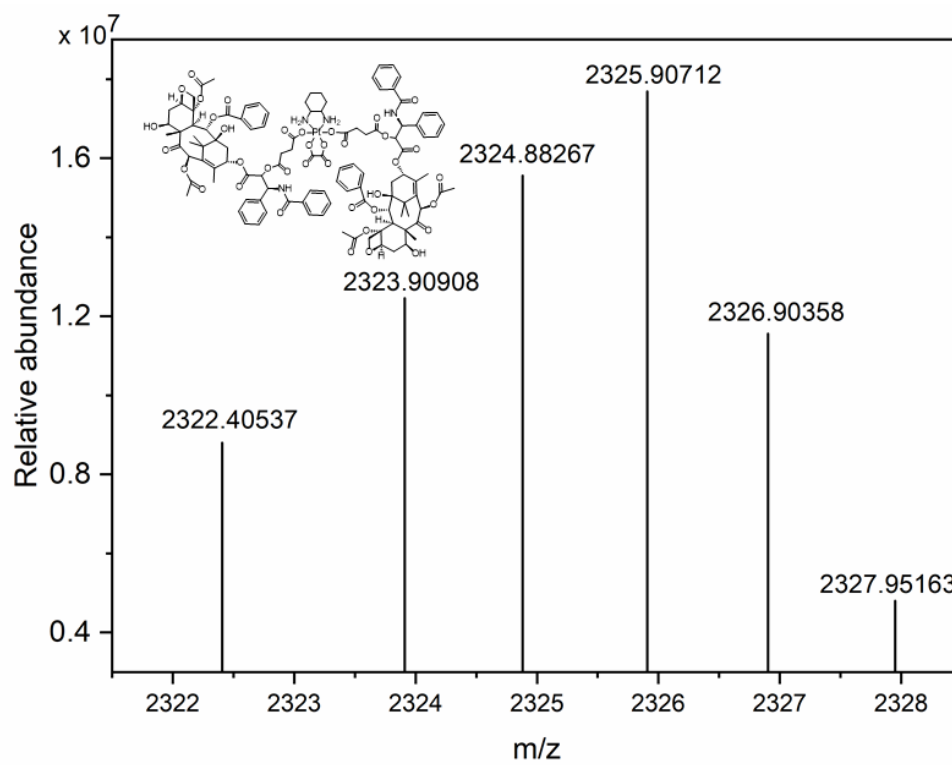

Fig. S36. HR-MS spectrum (positive mode) of compound **11**.

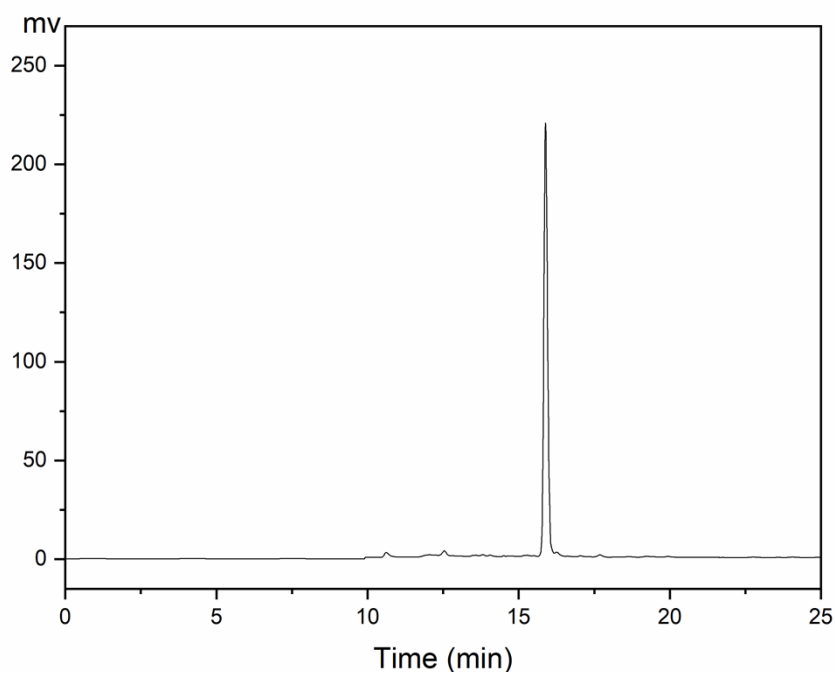

Fig. S37. HPLC characterization of compound 11.

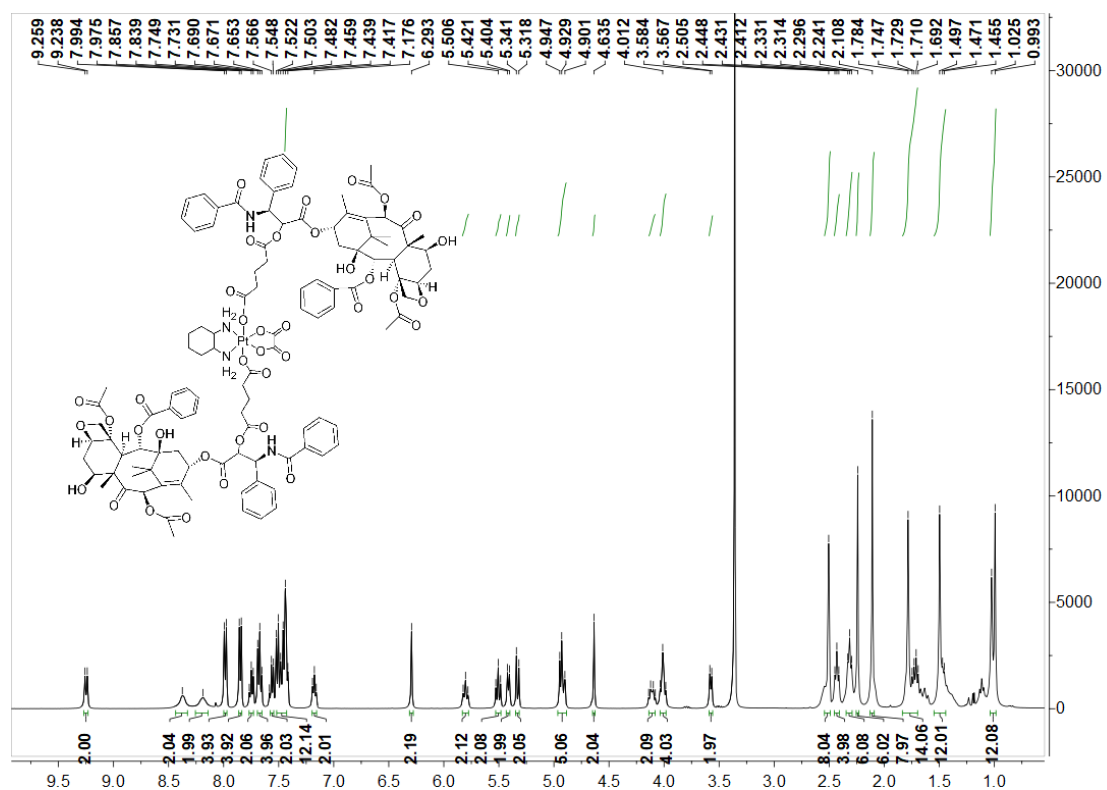

Fig. S38. <sup>1</sup>H-NMR spectrum of compound 12 in DMSO-*d*<sub>6</sub>.

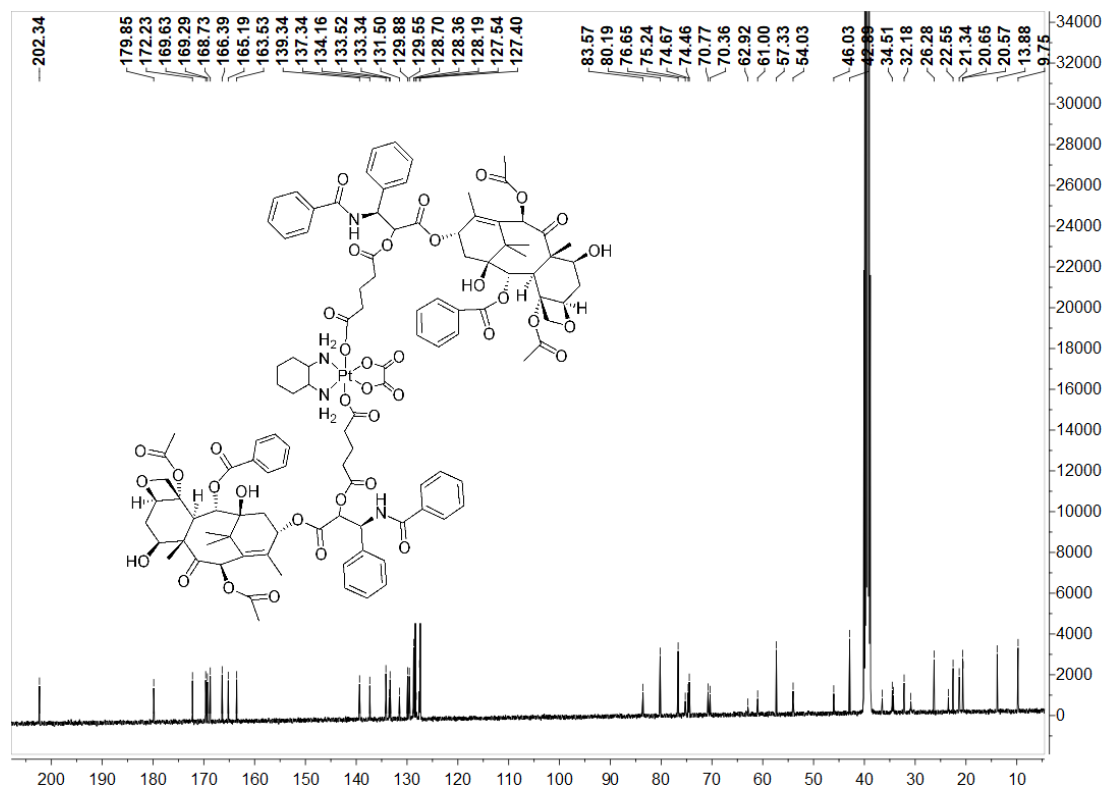

Fig. S39.  $^{13}\text{C}$ -NMR spectrum of compound 12 in  $\text{DMSO-}d_6$ .

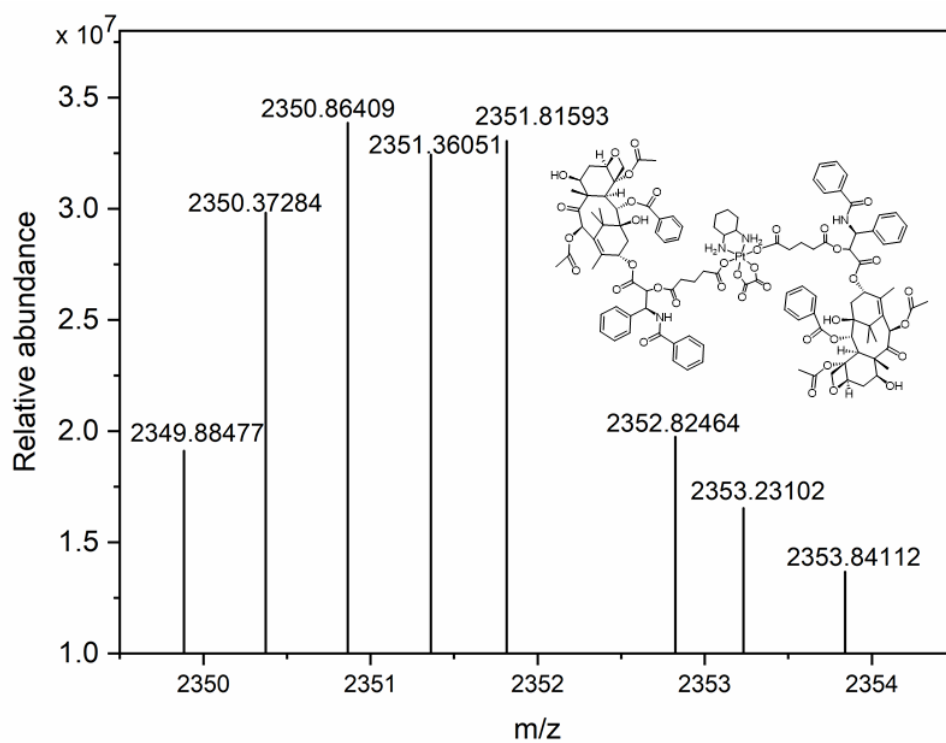

Fig. S40. HR-MS spectrum (positive mode) of compound 12.

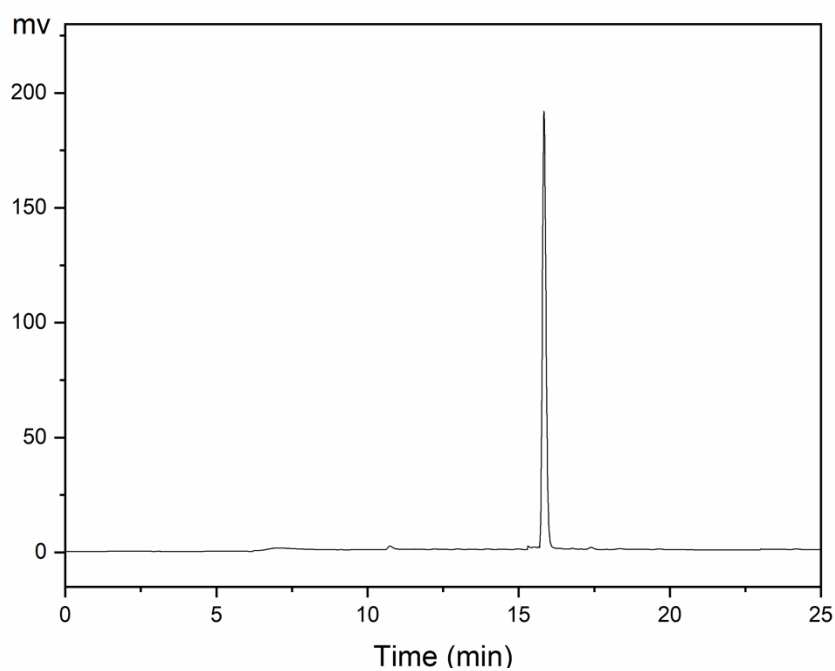

**Fig. S41.** HPLC characterization of compound **12**.

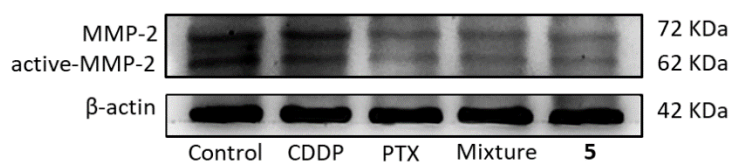

**Fig. S42.** Western blotting analysis of MMP-2 in MCF-7 cells after treatment with various compounds (5  $\mu$ M) for 24 h, Mixture stands for a combination of CDDP (5  $\mu$ M) and PTX (5  $\mu$ M).



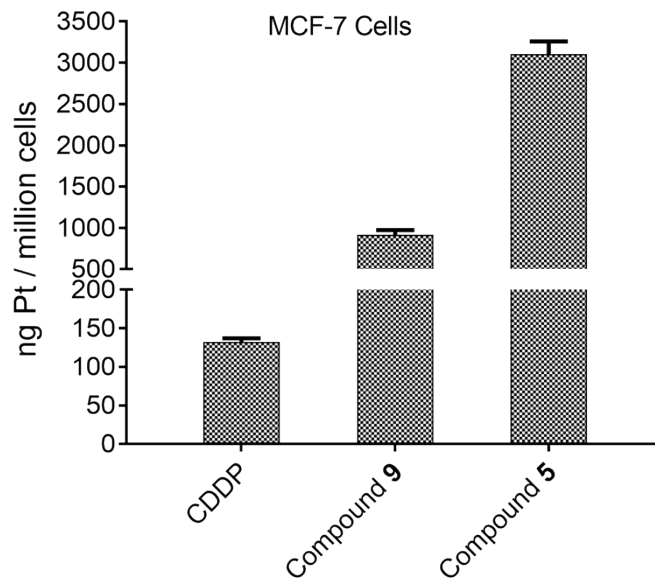

**Fig. S43.** Cellular accumulation of the indicated compounds at 10  $\mu$ M for 9 h treatment.

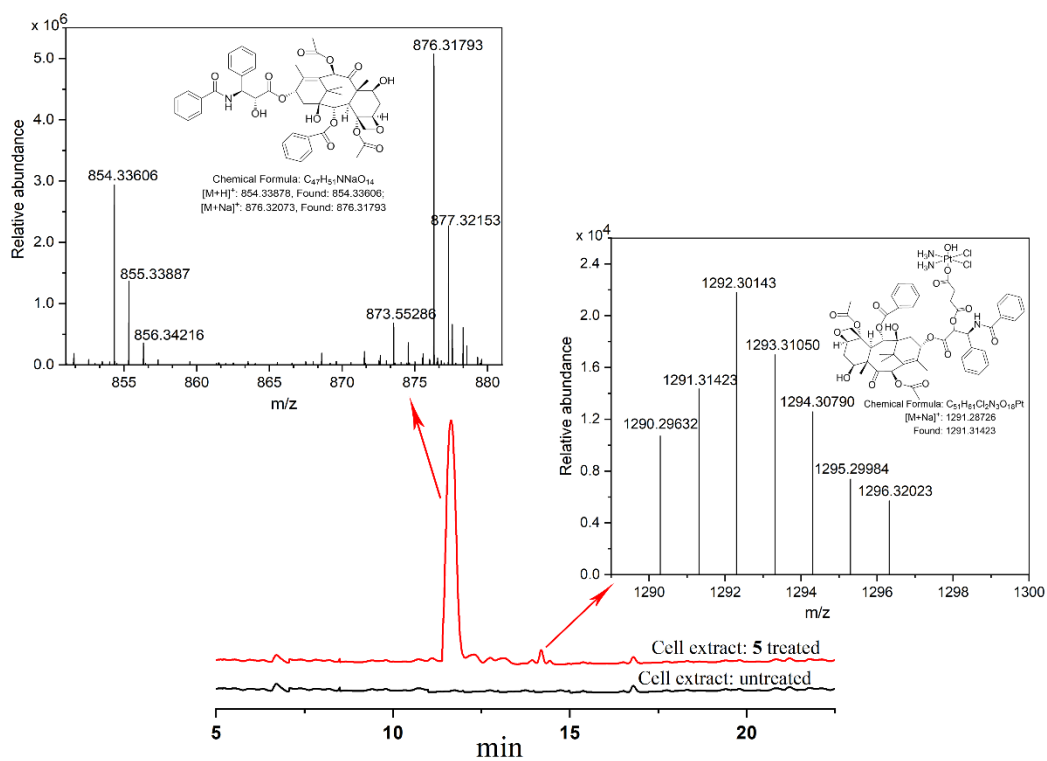

**Fig. S44** The results of HPLC and HR-MS analysis for MCF-7 cells extract after treated with **5** for 4 h, using untreated cells extract as controls.
